# Supplementary material for: Neoadjuvant therapy-induced immune dynamics and myeloid-associated resistance in advanced head and neck cancer
Source: Springer Nature journal article supplement (doi:10.1038/s41698-025-00954-1), 2025-06-07
Supplement: MOESM1 [file 41698_2025_954_MOESM1_ESM.pdf]

## **Supplementary Material**

### **Immune microenvironmental alternations related to efficacy and resistance for chemo- and targeted therapy in head and neck squamous cell carcinoma**

**Authors:** Alisa Kimura, Junichi Mitsuda, Kanako Yoshimura, Sumiyo Saburi, Nanako Murakami, Nana Sakurai, Koichi Yoshizawa, Hiroki Morimoto, Shigeyuki Mukudai, Hikaru Nagao, Hiroshi Ogi, Saya Shibata, Aya Miyagawa-Hayashino, Eiichi Konishi, Kyoko Itoh, Shigeru Hirano, Takahiro Tsujikawa

**Supplementary Figure 1. Cleaved caspase 3 expression during chemo-targeted therapy.**

**Supplementary Figure 2. Tumor microenvironmental markers during chemo-targeted therapy.**

**Supplementary Table 1. A list of antibodies and conditions used for immune composition panel.**

**Supplementary Table 2. A list of antibodies and conditions used for tumor microenvironmental marker panel.**

**Supplementary Table 3. A list of antibodies and conditions used for cell death marker panel.**

**Supplementary Table 4. Identification markers for immune cell lineages.**

## Supplementary Figure 1

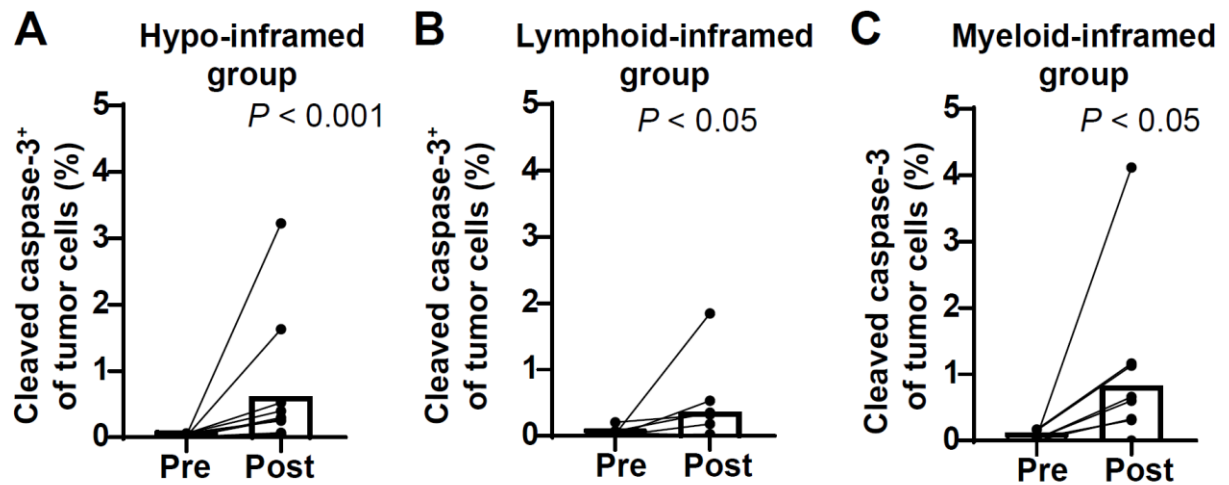

**Supplementary Figure 1. Cleaved caspase 3 expression during chemo-targeted therapy.**

(A–C) Percentages of cleaved caspase-3<sup>+</sup> tumor cells at baseline and post-treatment status were comparatively evaluated, stratified into the hypo-inflamed ( $n = 11$ ) (A), lymphoid-inflamed ( $n = 9$ ) (B), and myeloid-inflamed groups ( $n = 10$ ) (C). Bars represent the median. Statistical differences were determined via Wilcoxon matched-pairs signed rank tests.

## Supplementary Figure 2

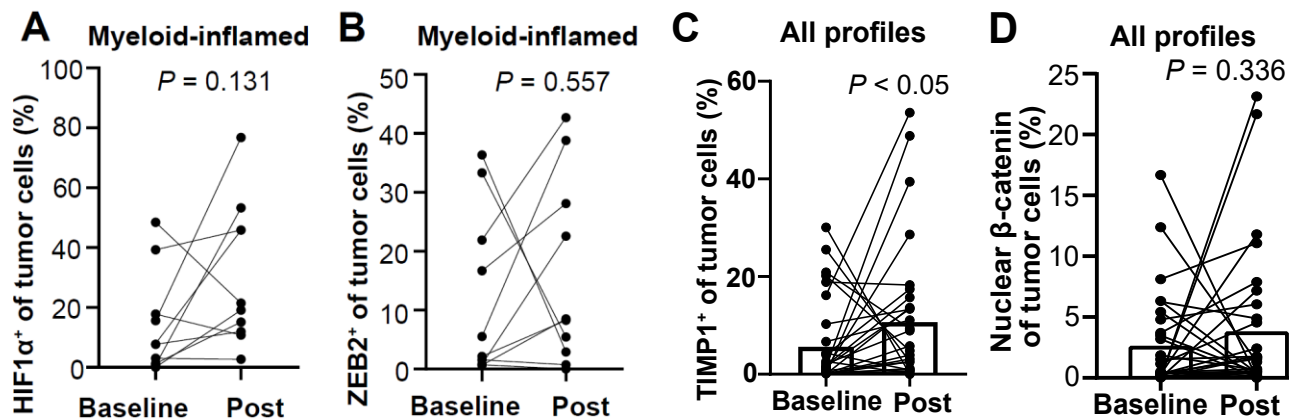

**Supplementary Figure 2. Tumor microenvironmental markers during chemo-targeted therapy.**

(A–B) Percentages of HIF1 $\alpha^+$  (A) and ZEB2 $^+$  (B) tumor cells in the myeloid-inflamed group, comparing baseline and post-treatment status ( $n = 10$ ). (C–D) Percentages of TIMP1 $^+$  (C) and nuclear  $\beta$ -catenin $^+$  (D) tumor cells in the all profiles, comparing baseline and post-treatment status ( $N = 30$ ). Statistical differences were determined via Wilcoxon matched-pairs signed-rank tests.

**Supplementary Table 1. A list of antibodies and conditions used for immune composition panel.**

|                 | Cycle1         | Cycle2        | Cycle3         | Cycle4         | Cycle5      | Cycle6     | Cycle7         |
|-----------------|----------------|---------------|----------------|----------------|-------------|------------|----------------|
| Primary Ab      | Hematoxylin    | PD1           | CD8            | CD3            | NKp46       | CD68       | CD45           |
| Clone/Product#  | S3301          | NAT105        | C8/144B        | SP7            | 195314      | PG-M1      | H130           |
| Supplier        | Dako           | Abcam         | Thermo science | Thermo science | R&D         | Abcam      | Thermo science |
| Concentration   |                | 1/50          | 1/100          | 1/50           | 1/200       | 1/50       | 1/100          |
| Reaction        | 2min           | RT, 30min     | RT, 30min      | RT, 30min      | RT, 30min   | RT, 30min  | RT, 30min      |
| Secondary Ab    |                | Anti-Mouse    | Anti-Mouse     | Anti-rabbit    | Anti-Mouse  | Anti-Mouse | Anti-Mouse     |
| Reaction        |                | RT, 30min     | RT, 30min      | RT, 30min      | RT, 30min   | RT, 30min  | RT, 30min      |
| AEC             |                |               | 20min          |                | 20min       | 20min      | 20min          |
| AMEC            |                | 5min          |                | 5min           |             |            |                |
|                 | Cycle8         | Cycle9        | Cycle10        | Cycle11        | Cycle12     | Cycle13    | Cycle14        |
| Primary Ab      | PDL1           | DC-LAMP       | Foxp3          | CD20           | CD66b       | Tryptase   | Pan-CK         |
| Clone/Product # | EIL3N          | 16H11.2       | 236A/E7        | L26            | G10F5       | AA1        | AE1/AE3        |
| Supplier        | Cell signaling | EMD Millipore | eBioscience    | Abcam          | eBioscience | Abcam      | Abcam          |
| Concentration   | 1/100          | 1/200         | 1/40           | 1/200          | 1/400       | 1/20,000   | 1/2000         |
| Reaction        | 4°C overnight  | RT, 30min     | RT, 30min      | RT, 30min      | RT, 30min   | RT, 30min  | RT, 30min      |
| Secondary Ab    | Anti-rabbit    | Anti-Mouse    | Anti-Mouse     | Anti-Mouse     | Anti-Mouse  | Anti-Mouse | Anti-Mouse     |
| Reaction        | RT, 30min      | RT, 30min     | RT, 30min      | RT, 30min      | RT, 30min   | RT, 30min  | RT, 30min      |
| AEC             |                | 20min         | 20min          | 20min          | 20min       | 20min      | 20min          |
| AMEC            | 5min           |               |                |                |             |            |                |

AEC: AEC Substrate Kit, Peroxidase (HRP), (3-amino-9-ethylcarbazole) (SK-4200)

AMEC: ImmPACT® AMEC Red Substrate Kit, Peroxidase (HRP) (SK-4285)

**Supplementary Table 2. A list of antibodies and conditions used for tumor microenvironmental marker panel.**

|                | Cycle1        | Cycle2      | Cycle3        | Cycle4           | Cycle5         | Cycle6      | Cycle7       |
|----------------|---------------|-------------|---------------|------------------|----------------|-------------|--------------|
| Primary Ab     | Hematoxylin   | ZEB2        | HIF1 $\alpha$ | $\beta$ -catenin | CD3            | DKK-1       | PINCH1       |
| Clone/Product# | S3301         | HPA003456   | ab114977      | ab16051          | SP7            | ab61034     | MABT162      |
| Supplier       | Dako          | Merck       | Abcam         | Abcam            | Thermo science | Abcam       | Merck        |
| Concentration  |               | 1/75        | 1/75          | 1/300            | 1/100          | 1/100       | 1/40         |
| Reaction time  | 2min          | RT, 30min   | RT, 30min     | RT, 30min        | RT, 30min      | RT, 30min   | RT, 30min    |
| Secondary Ab   |               | Anti-rabbit | Anti-rabbit   | Anti-rabbit      | Anti-rabbit    | Anti-rabbit | Anti-mouse   |
| Reaction time  |               | RT, 30min   | RT, 30min     | RT, 30min        | RT, 30min      | RT, 30min   | RT, 30min    |
| AEC            |               | 20min       | 20min         | 20min            | 20min          | 20min       | 20min        |
|                | Cycle8        | Cycle9      | Cycle10       | Cycle11          | Cycle12        | Cycle13     | Cycle14      |
| Primary Ab     | $\alpha$ -SMA | CD68        | ZFX           | ADAM10           | Ki-67          | pCK         | TIMP1        |
| Clone/Product# | ab5694        | PG-M1       | HPA003877     | ab19026          | SP6            | AE1/AE3     | ab211926     |
| Supplier       | Abcam         | Abcam       | Merck         | Merck            | Sigma-Aldrich  | Abcam       | Abcam        |
| Concentration  | 1/200         | 1/50        | 1/1200        | 1/2000           | 1/2000         | 1/2000      | 1/1000       |
| Reaction time  | RT, 30min     | RT, 30min   | RT, 30min     | RT, 30min        | RT, 30min      | RT, 30min   | RT, 30min    |
| Secondary Ab   | Anti-rabbit   | Anti-mouse  | Anti-rabbit   | Anti-rabbit      | Anti-rabbit    | Anti-mouse  | Anti- rabbit |
| Reaction time  | RT, 30min     | RT, 30min   | RT, 30min     | RT, 30min        | RT, 30min      | RT, 30min   | RT, 30min    |
| AEC            | 20min         | 20min       | 20min         | 20min            | 20min          | 20min       | 20min        |

**Supplementary Table 3. A list of antibodies and conditions used for cell death marker panel.**

|                | Cycle1      | Cycle2         | Cycle3     | Cycle4        | Cycle5     | Cycle6      |
|----------------|-------------|----------------|------------|---------------|------------|-------------|
| Primary Ab     | Hematoxylin | CCP3           | CALR       | Ki-67         | PanCK      | LAG3        |
| Clone/Product# | Dako        | ASP175         | FMC75      | SP6           | AE1/AE3    | EPR4392     |
| Supplier       |             | Cell signaling | Abcam      | Sigma-Aldrich | Abcam      | Abcam       |
| Concentration  | Original    | 1/400          | 1/20000    | 1/100         | 1/2000     | 1/1000      |
| Reaction       | 2min        | 4°C overnight  | RT, 30min  | RT, 30min     | RT, 30min  | 30min, RT   |
| Secondary Ab   |             | Anti-rabbit    | Anti-Mouse | Anti-rabbit   | Anti-Mouse | Anti-rabbit |
| Reaction       |             | 30min, RT      | 30min, RT  | 30min, RT     | 30min, RT  | 30min, RT   |
| AEC            |             | 20min          | 20min      | 20min         | 20min      | 20min       |

**Supplementary Table 4. Identification markers for immune cell lineages.**

| <b>Immune cell subpopulation</b> | <b>Abbreviation</b>     | <b>Marker</b>                                                                                                                        |
|----------------------------------|-------------------------|--------------------------------------------------------------------------------------------------------------------------------------|
| CD8 <sup>+</sup> T cells         | CD8 T                   | CD45 <sup>+</sup> CD3 <sup>+</sup> CD8 <sup>+</sup>                                                                                  |
| Regulatory T cells               | T <sub>REG</sub>        | CD45 <sup>+</sup> CD3 <sup>+</sup> CD8 <sup>-</sup> Foxp3 <sup>+</sup>                                                               |
| Helper T cells                   | Helper T                | CD45 <sup>+</sup> CD3 <sup>+</sup> CD8 <sup>-</sup> Foxp3 <sup>-</sup>                                                               |
| B cells                          | B cell                  | CD45 <sup>+</sup> CD3 <sup>-</sup> NKp46 <sup>-</sup> CD20 <sup>+</sup>                                                              |
| Natural killer cells             | NK                      | CD45 <sup>+</sup> CD3 <sup>-</sup> NKp46 <sup>+</sup>                                                                                |
| Mast cells                       | Mast cell               | CD45 <sup>+</sup> CD3 <sup>-</sup> CD20 <sup>-</sup> CD66b <sup>-</sup> Tryptase <sup>+</sup>                                        |
| Granulocytes                     | Gr                      | CD45 <sup>+</sup> CD3 <sup>-</sup> CD20 <sup>-</sup> CD66b <sup>+</sup>                                                              |
| Tumor associated macrophages     | TAM                     | CD45 <sup>+</sup> CD3 <sup>-</sup> CD20 <sup>-</sup> CD66b <sup>-</sup> Tryptase <sup>-</sup> CD68 <sup>+</sup>                      |
| Dendritic cells                  | DC                      | CD45 <sup>+</sup> CD3 <sup>-</sup> CD20 <sup>-</sup> CD66b <sup>-</sup> Tryptase <sup>-</sup> CD68 <sup>-</sup> DC-LAMP <sup>+</sup> |
| CD45 <sup>+</sup> other          | CD45 <sup>+</sup> other | CD45 <sup>+</sup> CD3 <sup>-</sup> CD20 <sup>-</sup> CD66b <sup>-</sup> Tryptase <sup>-</sup> CD68 <sup>-</sup> DC-LAMP <sup>-</sup> |
